# Supplementary material for: Can Humans Become More Random?
Source: Research Square preprint supplement (doi:10.21203/rs.3.rs-151863/v1), 2021-02-01
Supplement: Supplementary file 1 [file ac6ed94b3dec6f2fc11a03b1.docx]

**Can humans become more random?**

Sook Mun Wong1,2,4, Garance Merholz1,7, Uri Maoz1,2,3,5,6*,

1 Department of Psychology, University of California Los Angeles, Los Angeles, CA, USA

2 Institute for Interdisciplinary Brain and Behavioral Sciences, Chapman University, Irvine, CA

3 Department of Psychology, Crean College of Health and Behavioral Sciences, Chapman University, Orange, CA

4 Computational and Data Sciences, Schmid College of Science and Technology, Chapman University, Orange, CA

5 Anderson School of Management, University of California Los Angeles, Los Angeles, CA, USA

6 Biology and Bioengineering, California Institute of Technology, Pasadena, CA, USA

7 Université de Paris, CNRS, Integrative Neuroscience and Cognition Center, F-75006 Paris, France

* Corresponding Author:

Uri Maoz

Chapman University, One University Drive, Orange, CA 92866

Email address: [maoz@chapman.edu](mailto:maoz@chapman.edu)

**Supplementary Tables and Figures**

**Supplementary Table 1.** OLS regression of average run-length on LZC score for all experiment parts and conditions combined
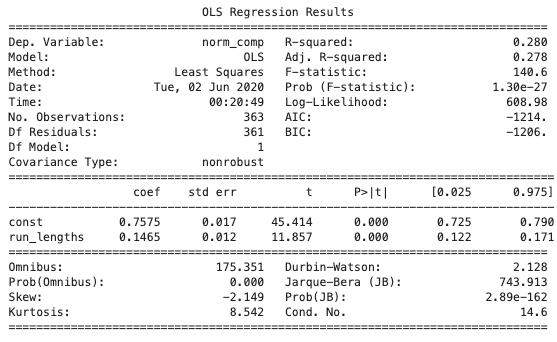


**Supplementary Figure 1.** Regression plot of average run-length on LZC score for all experiment parts and conditions combined


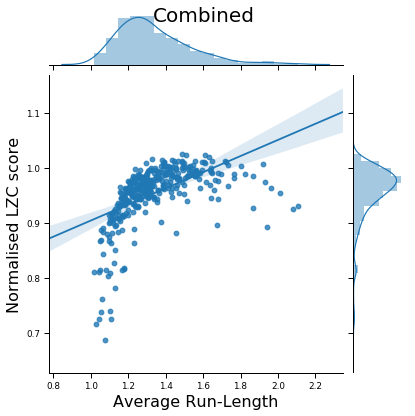


**Supplementary Table 2.** OLS regression of average run-length on LZC score for the pre-game part of the experiment.

**
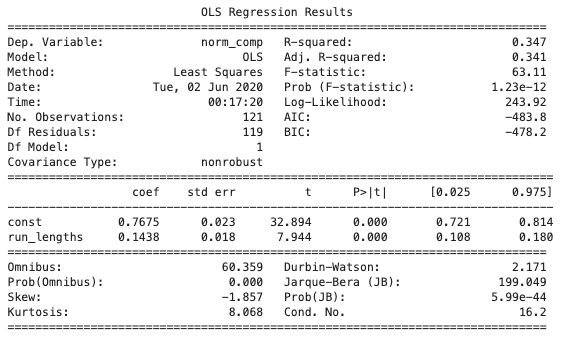
**

**Supplementary Figure 2.** Regression plot of average run-length on LZC score for the pre-game part of the experiment.

**
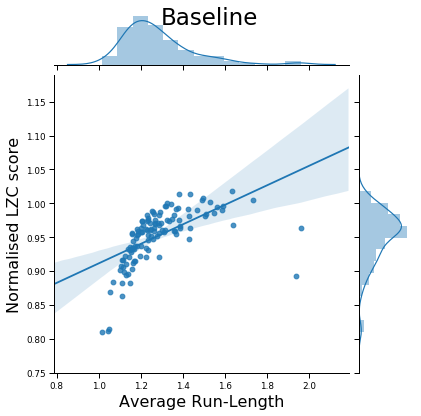
**

**Supplementary Table 3.** OLS regression of average run-length on LZC score for the game part of the experiment.

**
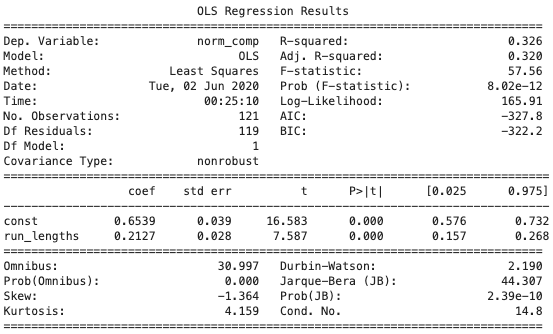
**

**Supplementary Figure 3.** Regression plot of average run-length on LZC score for the game part of the experiment.


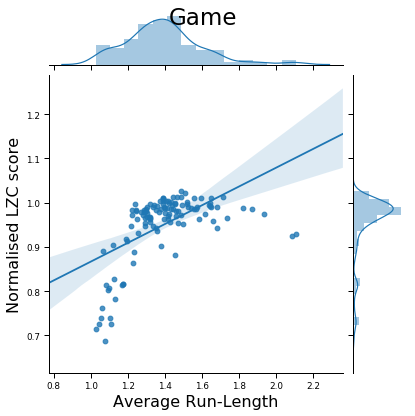


**Supplementary Table 4.** OLS regression of average run-length on LZC score for the game part of the experiment.

**
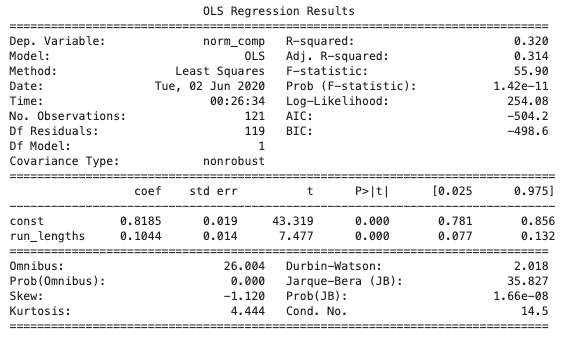
**

**Supplementary Figure 4.** Regression plot of average run-length on LZC score for the game part of the experiment.

**
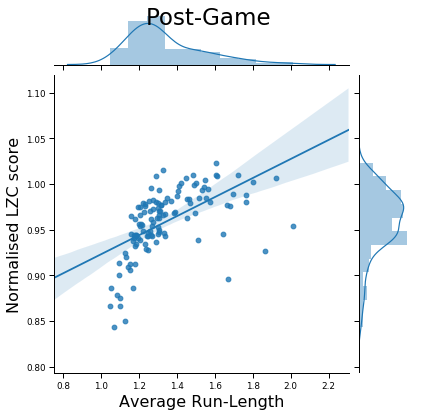
**
